# Supplementary material for: Forecasting the soil microbiome at a continental scale
Source: Research Square preprint supplement (doi:10.21203/rs.3.rs-5183308/v1), 2024-11-13
Supplement: Supplementary file 1 [file 4bab6d3e31c8573e217d771c.pdf]

**Forecasting the soil microbiome at a continental scale**

530  
531  
532  
533  
534  
535  
536  
537  
538  
539  
540  
541  
542  
543

Supplementary Materials for

**Forecasting the soil microbiome at a continental scale**

Zoey Werbin, Colin Averill, Jennifer Bhatnagar, Michael Dietze

Corresponding author: [zrwerbin@bu.edu](mailto:zrwerbin@bu.edu)

**The PDF file includes:**

- Figs. S1 to S19
- Tables S1 to S2
- Appendices S1 to S3

## Forecasting the soil microbiome at a continental scale

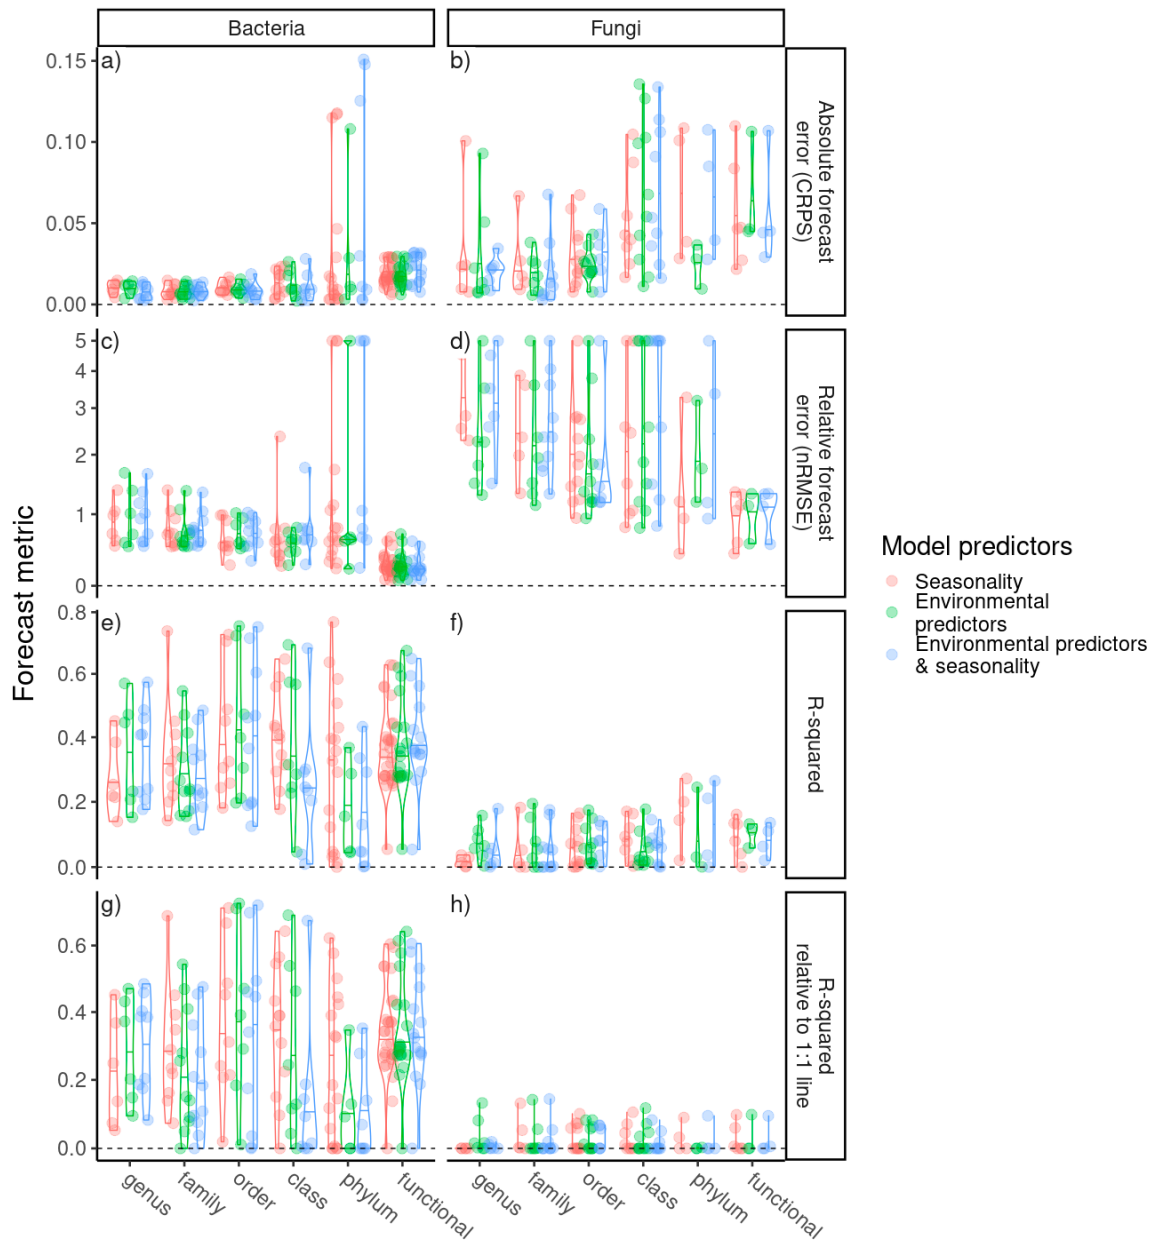

544

545 **Figure S1.** Forecast metrics across taxonomic ranks and functional groups of soil bacteria (left column)

546 and fungi (right column), for three different sets of model predictors.

## Forecasting the soil microbiome at a continental scale

### Absolute effect size

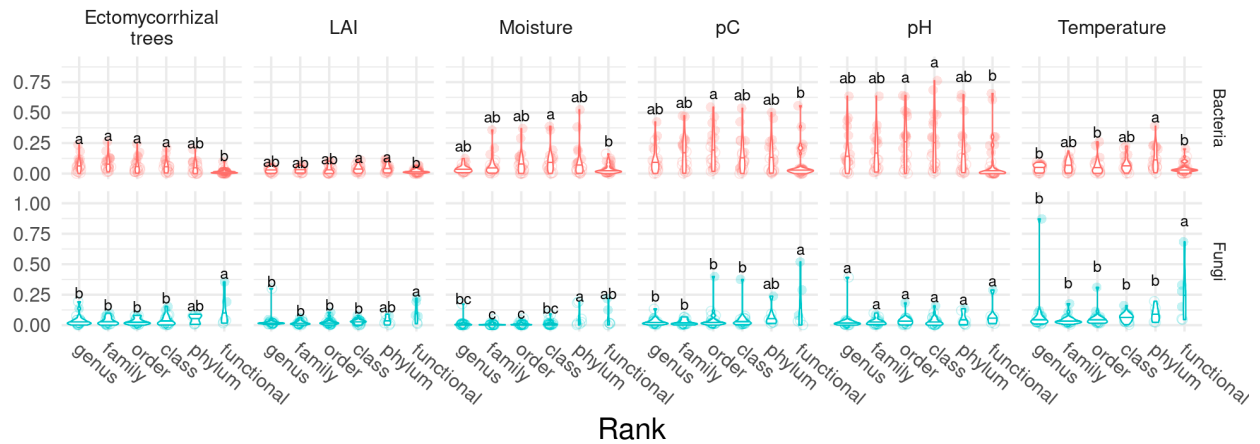

547

548

549

550

551

**Figure S2.** Absolute value of bacterial (top row) and fungal (bottom row) model estimates for taxonomic groups of soil microbes. Letters indicate distinct groups returned by Tukey's post-hoc test after ANOVA returned  $p < .05$ . For visualization, significance to each parameter was assigned if zero did not fall within the upper and lower 95% credible interval for the parameter.

## Forecasting the soil microbiome at a continental scale

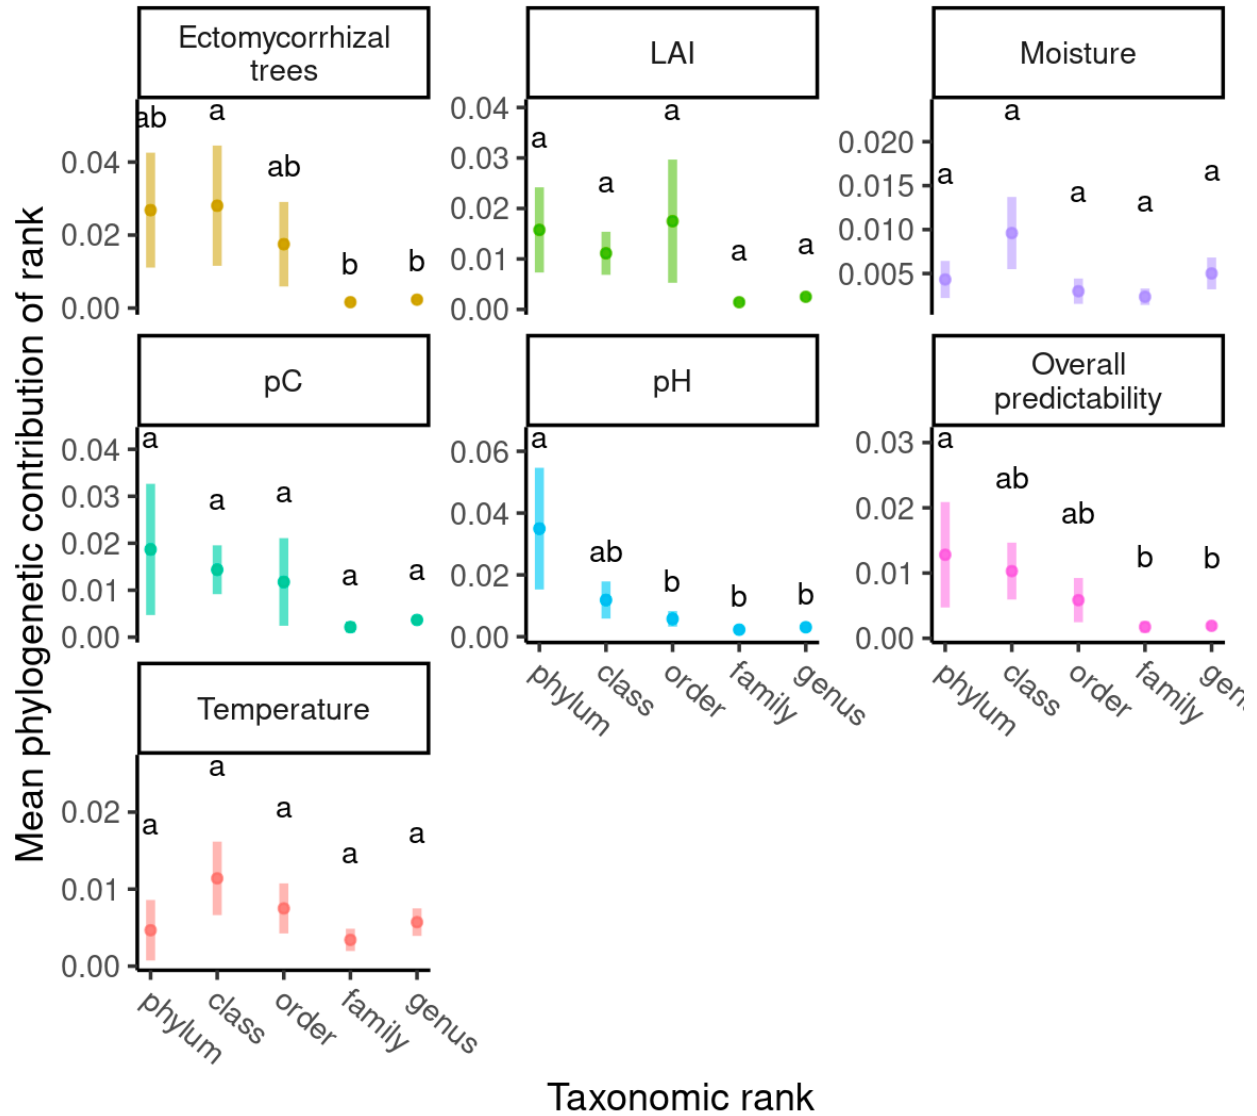

552

553

554

**Figure S3.** Mean phylogenetic contribution index of taxonomic ranks to variation in one of 6 environmental predictors, or overall predictability (RSQ) estimated via the phylocomr package (69).

## Forecasting the soil microbiome at a continental scale

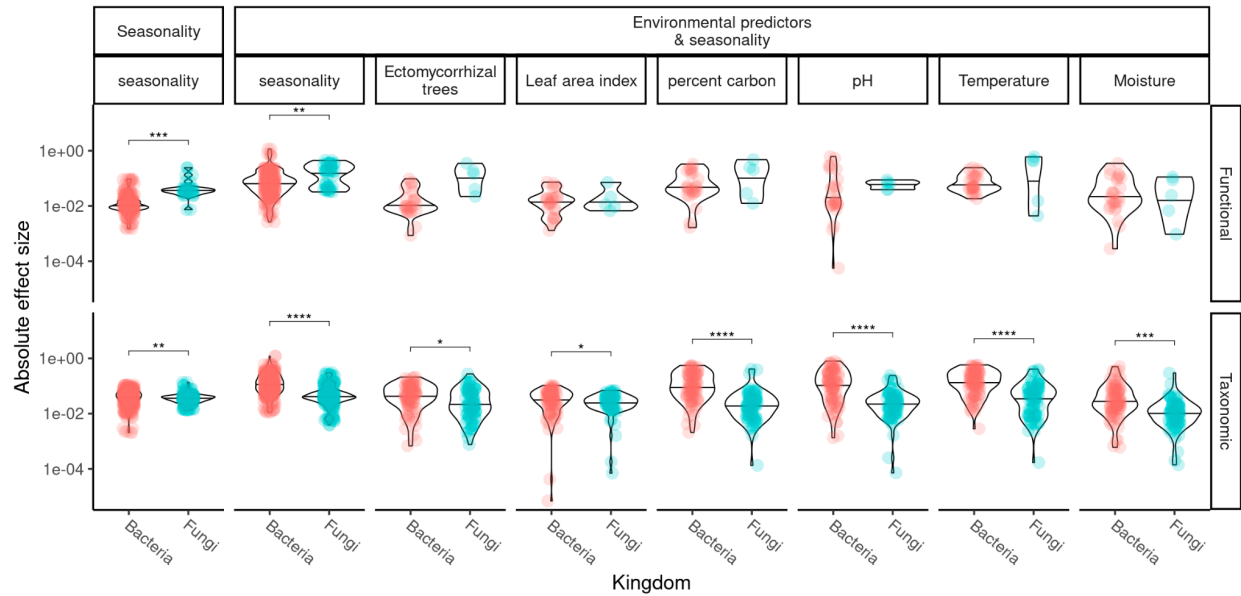

555

556

557

558

559

560

**Figure S4.** Violin plots showing parameter estimates for functional groups (top row) and taxonomic groups (bottom row) of soil microbes. T-tests show differences between fungi and bacteria for seasonal amplitude (estimated from seasonality-only model), seasonal amplitude (estimated from environmental predictor and seasonality model), and absolute sizes of environmental predictors, with asterisks indicating tests significant after false discovery rate p-value correction (83).

## Forecasting the soil microbiome at a continental scale

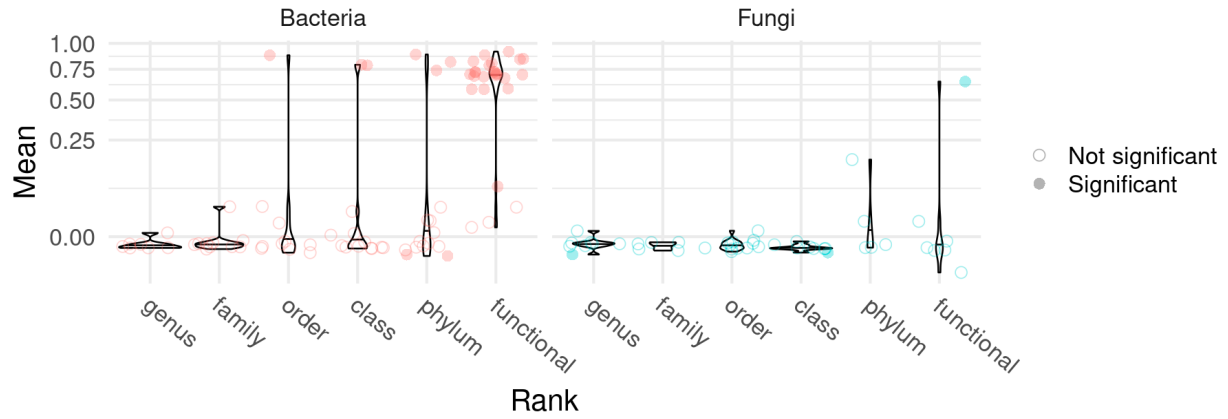

561  
562  
563  
564  
565

**Figure S5.** Mean of seasonality-only model estimates for  $\rho$  parameter, representing temporal memory (Equation 2).  $\rho$  is multiplied by abundance at previous timepoint. Significance was assigned if zero did not fall within the upper and lower 95% credible interval for the parameter.

## Forecasting the soil microbiome at a continental scale

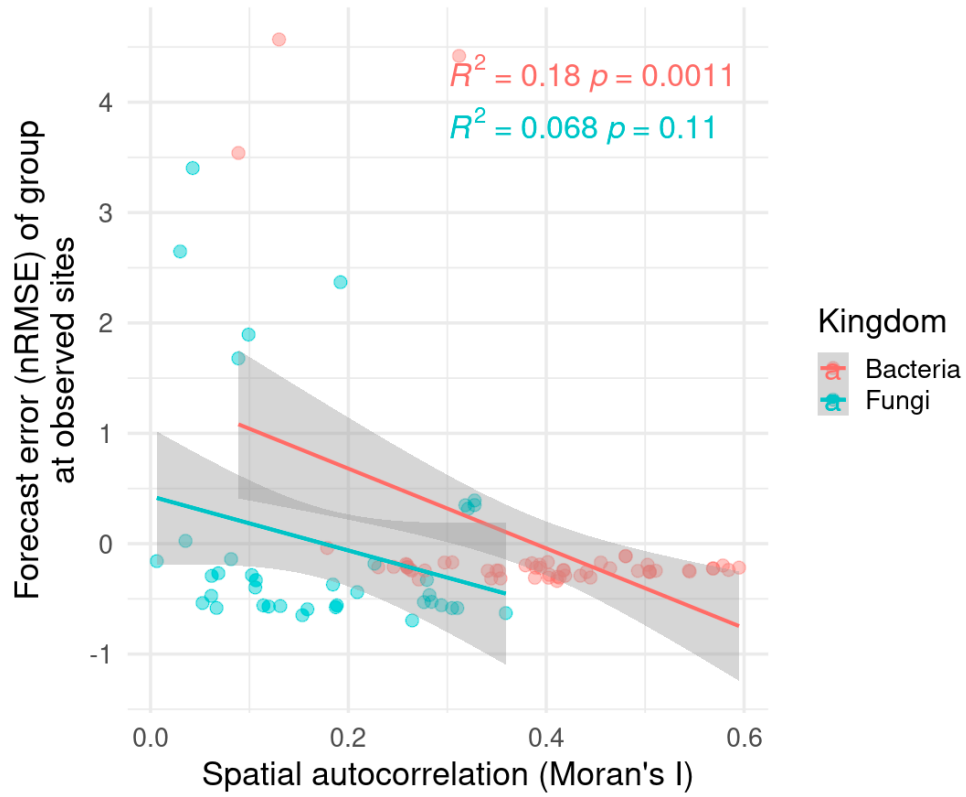

566

567

568 **Figure S6.** Scatterplot of positive relationship between forecast prediction RSQ and spatial  
569 autocorrelation, measured using Moran's I, with higher values indicating stronger clustering of  
570 abundances over space.

## Forecasting the soil microbiome at a continental scale

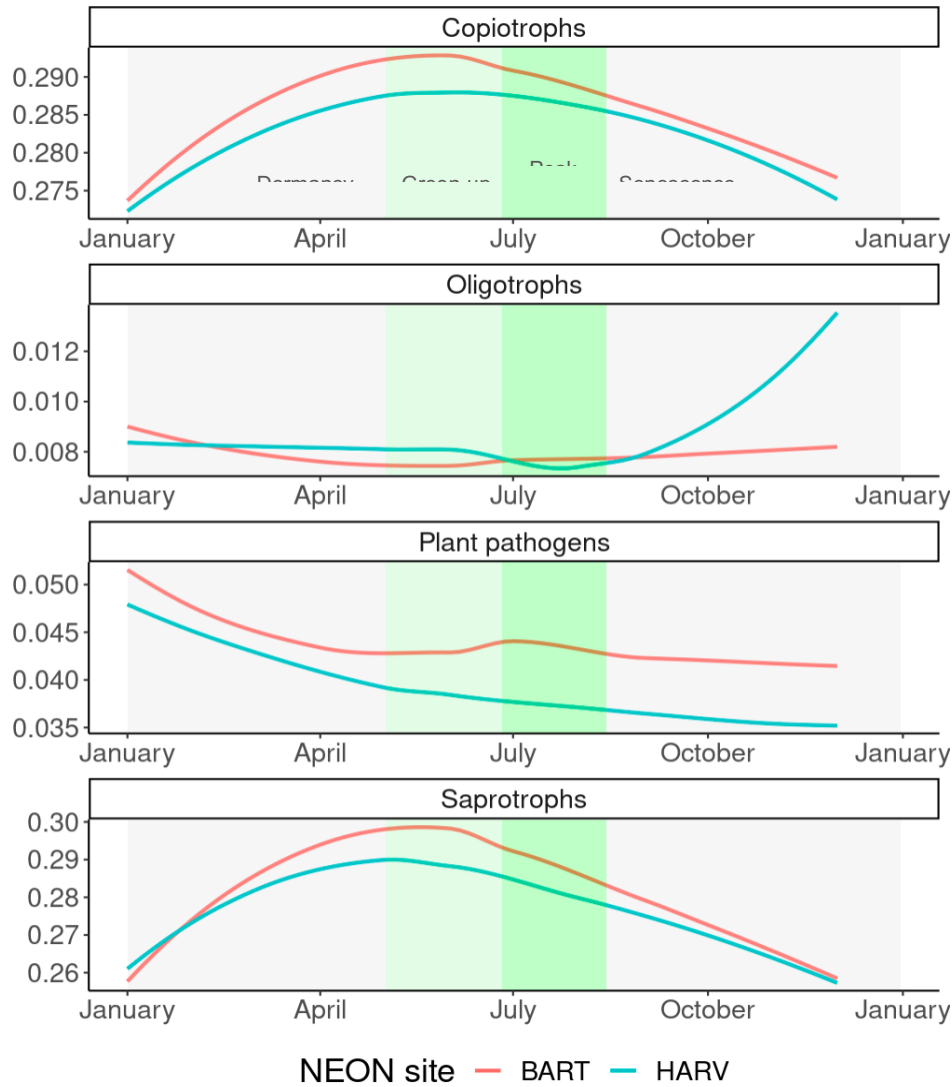

571  
572 **Figure S7.** Seasonal trends in abundances of functional groups that are expected to be associated with  
573 plant growing seasons. Lines indicate loess curves over the modeled abundances for two deciduous New  
574 England NEON sites (Bartlett Forest and Harvard Forest) with similar phenophase transition points  
575 (dormancy, greenup, peak greenness, and senescence). Copiotrophic bacteria are thought to thrive in high  
576 nutrient environments, such as soils during the growing season when plants are exchanging simple sugars  
577 with microbes, while oligotrophic bacteria thrive in lower-nutrient environments (64). Plant pathogens are  
578 fungi whose dominant trophic guild is plant pathogenic, and saprotrophs are free-living fungi that  
579 consume decaying organic matter.

## Forecasting the soil microbiome at a continental scale

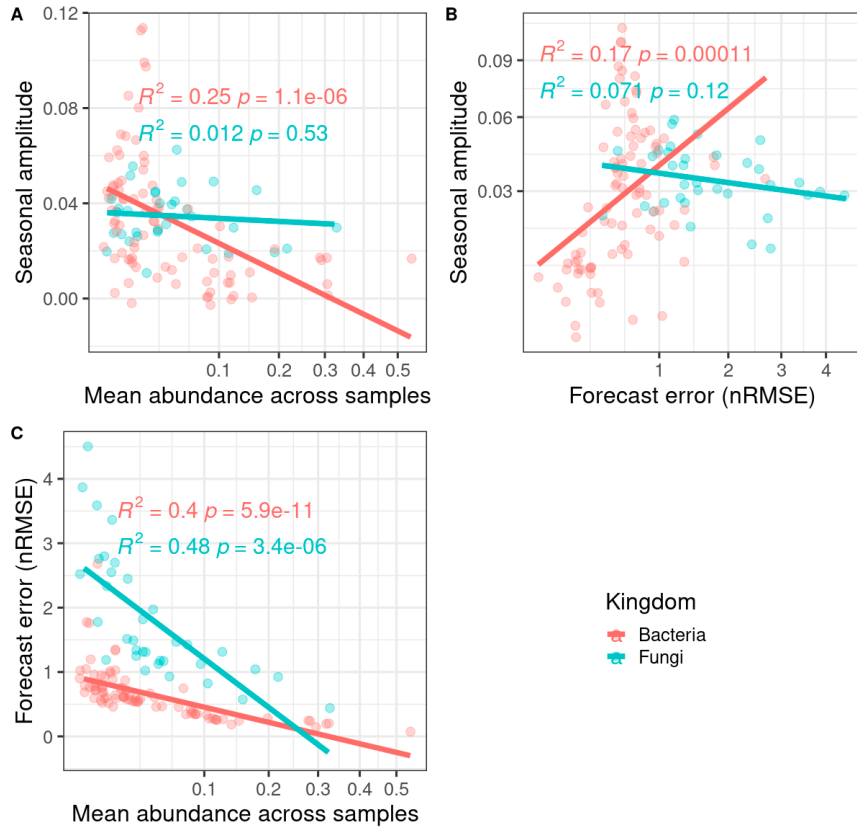

580

581

582

**Figure S8.** Scatterplot showing relationships between mean group abundance, forecast error (normalized root mean squared error, nRMSE), and seasonal amplitude, estimated from seasonality-only model.

## Forecasting the soil microbiome at a continental scale

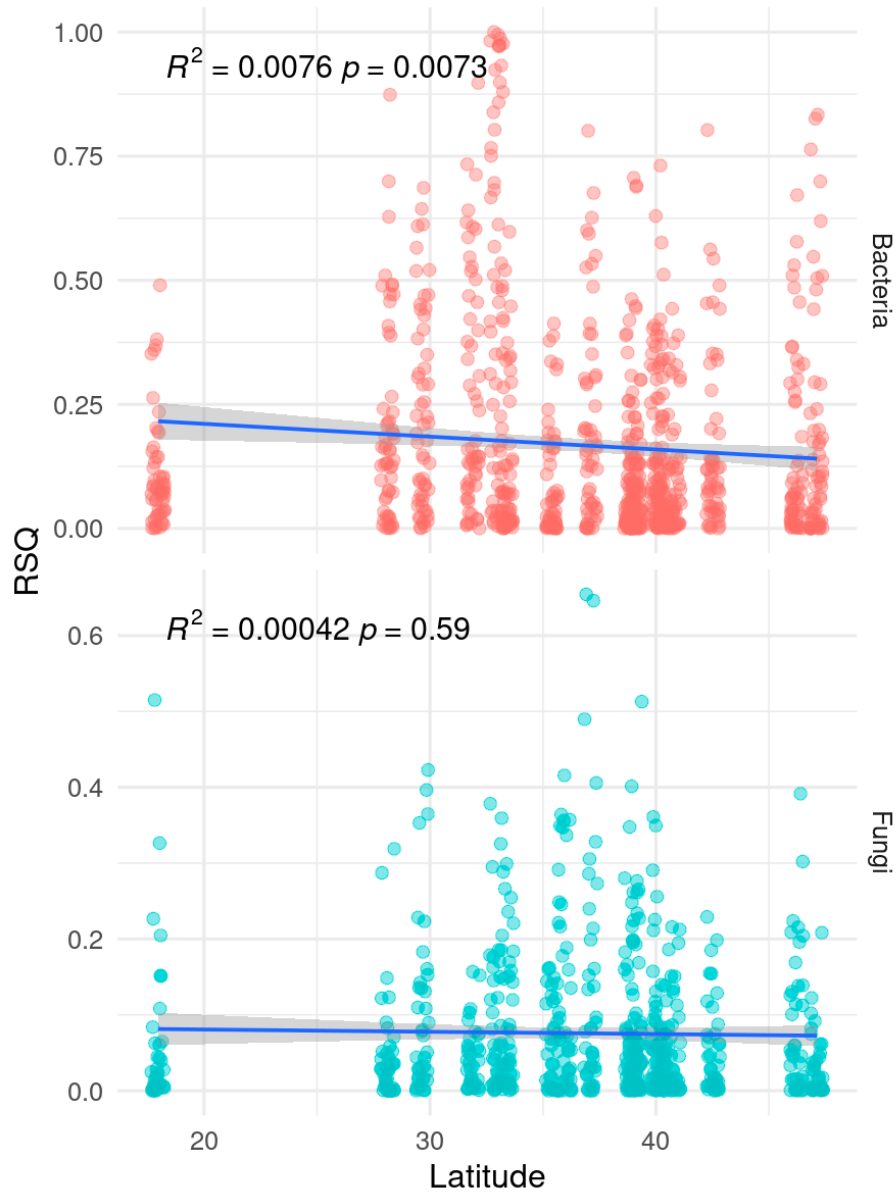

583

584 **Figure S9.** Scatterplot of relationship between site latitude and site forecast accuracy (R-squared of  
585 predicted and observed values) for fungi (teal) and bacteria (orange) for seasonality-only model, with  
586 similar patterns for other predictor sets.

## Forecasting the soil microbiome at a continental scale

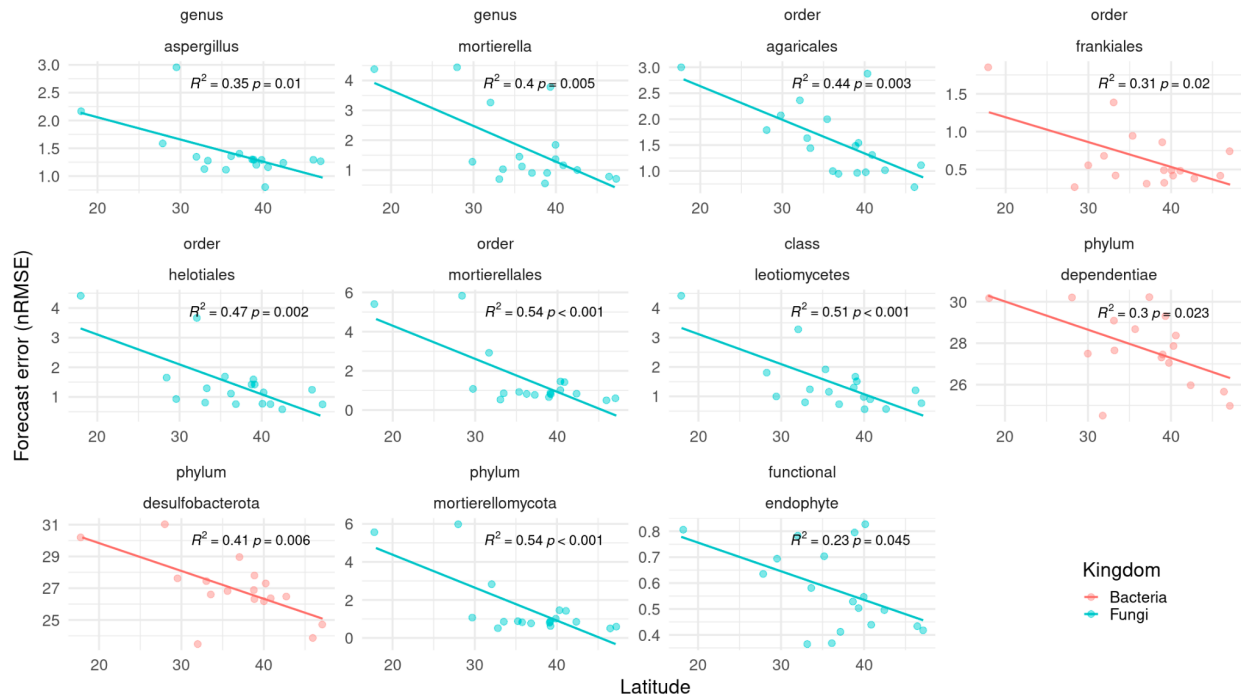

587

588

589

590

**Figure S10.** Forecast error (normalized root mean squared error, nRMSE) by latitude of observed sites, for groups with significant latitude-error relationships. Forecasts are from linear models with environmental predictors and seasonality.

## Forecasting the soil microbiome at a continental scale

Site effect autocorrelation is mostly captured by PLSR

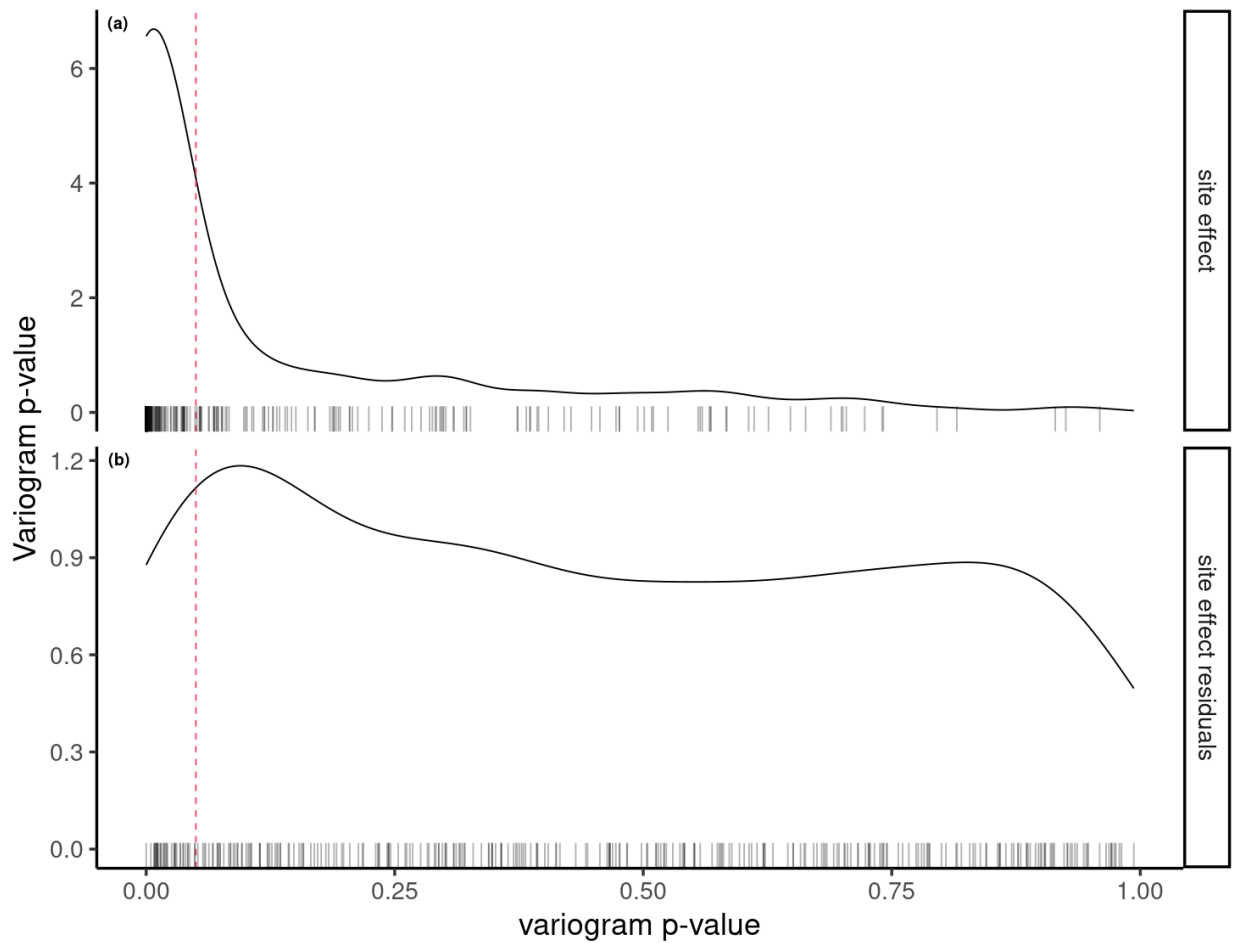

591  
592 **Figure S11.** P-values of variograms created for the random site effects of every statistical model. While  
593 the site effects estimated by the models tend to have a spatial signal (median p-value below .05), but this  
594 spatial signal is rarely significant in the residuals of site effects modeled by partial least-squares  
595 regression (PLSR). P-values of PLSR residuals were not significantly different from a uniform  
596 distribution, except for the models without seasonality predictors, which retained a weak spatial signal.  
597 Variograms generated by the "variogram" function in the gstat R package (84), and significance estimated  
598 using "envelope" and "envsig" in the variogram R package (85).

## Forecasting the soil microbiome at a continental scale

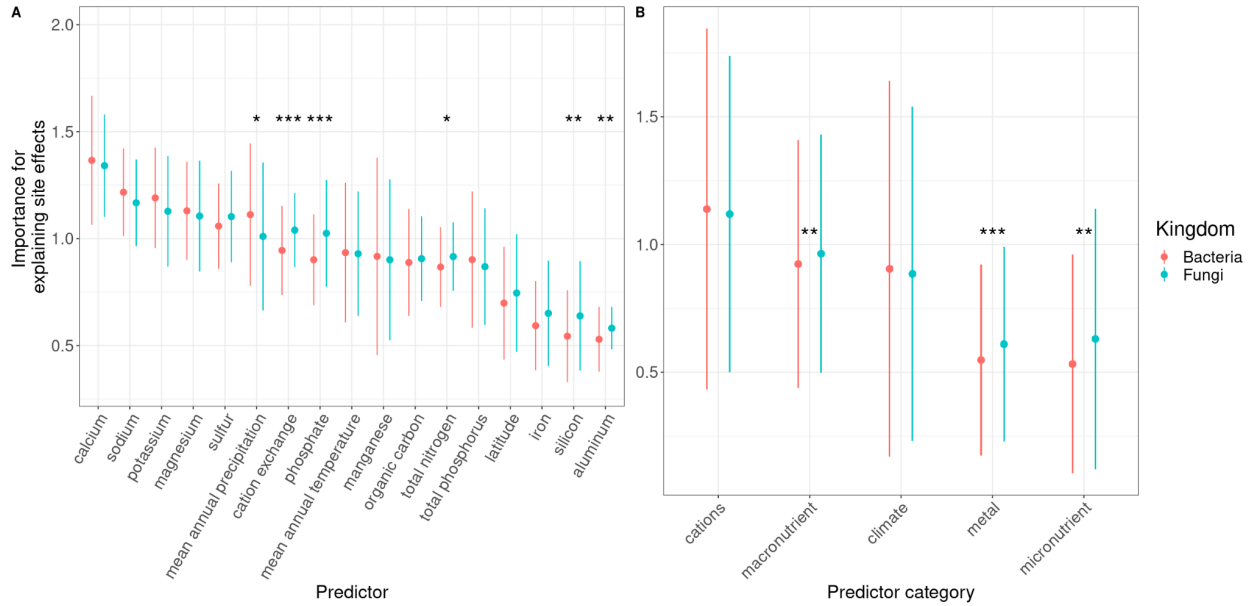

599  
600  
601  
602  
603  
604

**Figure S12.** Importance of site characteristics for explaining the site random effects of each soil fungal (orange) or bacterial (teal) group over time. Partial least squares regression models were fit to 30 site effect estimates using the `pls` function from the `pls` package, then importance was calculated from using the `"vip"` function from the `spectratrait` R package (82). Asterisks indicate significant T-tests at  $\alpha=.05$ , comparing importance values for all fungal and bacterial groups.

## Forecasting the soil microbiome at a continental scale

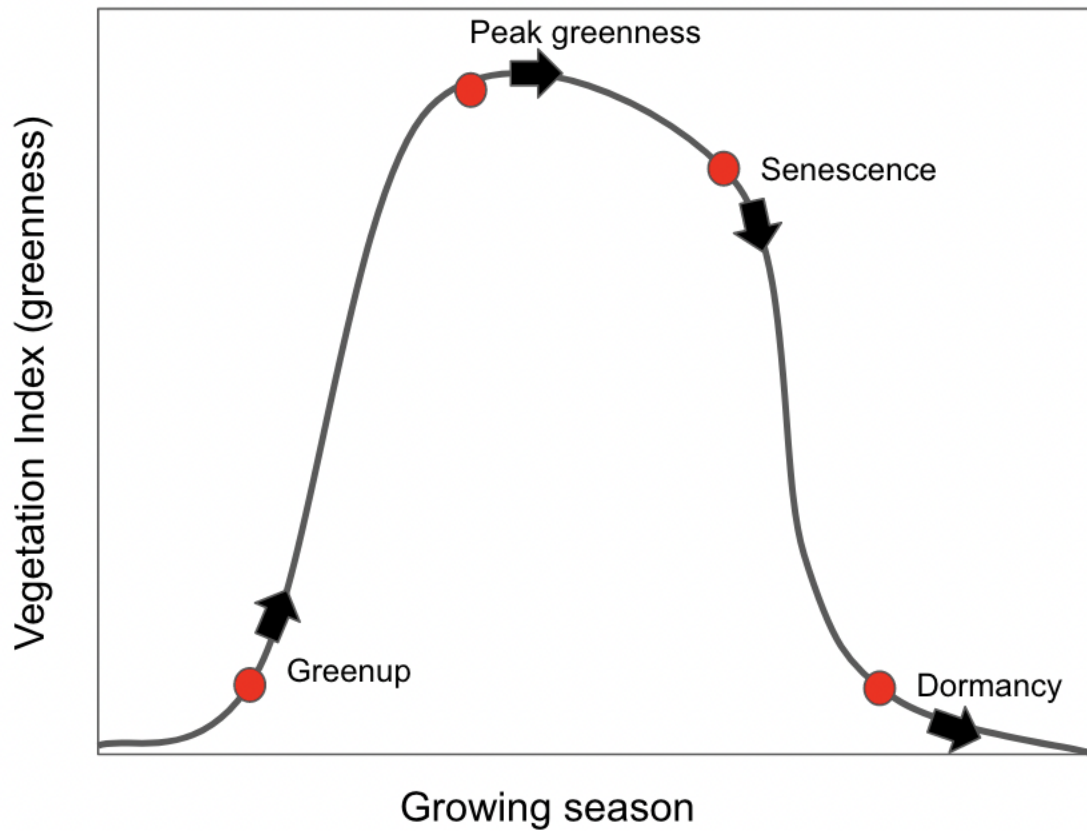

605  
606  
607  
608  
609

**Figure S13.** Simplified diagram of plant community phenophases assigned to each site and month by the MODIS Land Cover Dynamics data product (73). Among all 5362 site-month combinations within model calibration period, dormancy was assigned 2235 times, greenup 1115 times, peak greenness 492 times, and senescence 1520 times.

## Forecasting the soil microbiome at a continental scale

610 **Table S1. Parameter and performance summary.** Estimated parameters and performance for 673  
611 models fit to the calibration time period of 2015-11-01 to 2018-01-01. Significant linear model predictors  
612 are in bold text. NA values represent covariates not estimated by a given model, e.g. "seasonality" models  
613 included coefficients for the sine and cosine of the sampling month, but no other environmental  
614 predictors. Sigma is the process error associated with the plot-level linear model, and core\_sd is the  
615 standard deviation of samples taken from a single plot and timepoint. Rho is the temporal stability or  
616 autocorrelation between timepoints. (CSV)

617  
618 **Table S2. Summary of sites included in forecasting models.** NEON site descriptions and number of  
619 high-quality samples per site used in calibration and validation datasets for bacteria and fungi. Sample  
620 quality filtering is described in Methods. (CSV)

621 Supplementary text

622 Appendix S1: Extended data preparation methods.

623  
624 Scripts for downloading and preparing these datasets are located at [https://github.com/zoey-](https://github.com/zoey-rw/microbialForecasts)  
625 [rw/microbialForecasts](https://github.com/zoey-rw/microbialForecasts). Soil moisture and soil temperature data are released with approx. 1 month  
626 lag time by NEON, while microbial data takes multiple months to process before release.  
627 Therefore, “forecasts” of microbial abundance can be made before microbial data are released,  
628 but these forecasts do not continue into the future. While soil moisture and temperature are  
629 components of many weather and agricultural forecasting systems (i.e. Syngenta’s “Greencast”,  
630 National Weather Service Arkansas Red Basin forecasts), there are no publicly available forecast  
631 products that span the United States. If forecasts for model covariates become available, they  
632 will allow our microbial forecast system to extend into the future.

633  
634 Soil temperature

635 Soil temperature is measured continuously at all NEON sites via an array of five soil sensors at  
636 nine depths, and released as 30-minute averages (NEON DP1.00041.001). Soil temperatures  
637 represent point measurements, so the two sensors shallower than 30 cm were retained, to match  
638 the depths of microbial soil samples.

639  
640 As described in the above section, sensor depth was chosen through comparison between sensor  
641 temperature data and temperature measurements associated with the soil sub-samples used for  
642 microbial analyses (NEON DP1.10047.001). The resulting measurements from samples and soil  
643 sensors were compared via linear regression  $R^2$  values, and the shallowest sensor layer (0 cm  
644 deep) had the strongest relationship ( $R^2 = 0.63$ ) and was used for soil temperature inputs.

645  
646 Temperature data were gap-filled using daily air temperature data from DAYMET (86), which  
647 was strongly correlated with NEON soil sensor data (Figure S14).

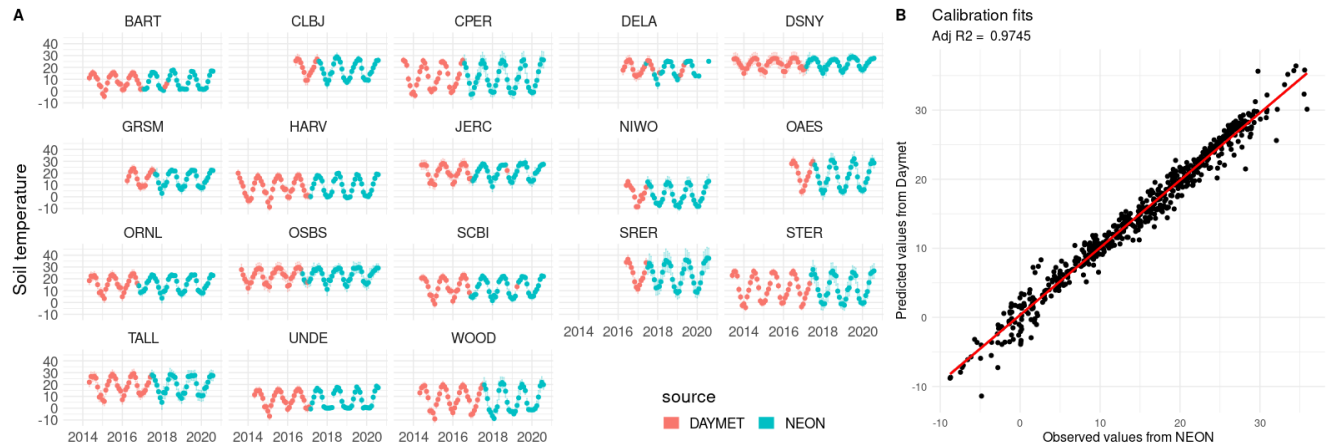

649 **Figure S14. A)** Gap-filled soil temperature time-series for NEON sites. **B)** DAYMET air temperature was  
 650 modeled as a linear function of NEON soil temperature sensor data, then the regression was used  
 651 to predict soil temperature at sites or monthly with missing soil temperature values. Uncertainty from sensor  
 652 uncertainty and monthly averaging was propagated into monthly predictions using an errors-in-variables  
 653 (EIV) approach in the NIMBLE statistical software.

654

655 Soil water content (i.e. soil moisture)

656 Volumetric soil water content (SWC) is measured continuously at all NEON sites via an array of  
 657 five soil sensors at eight depths, and released as 30-minute averages (NEON DP1.00094.001).  
 658 SWC sensors vertically integrate moisture from 5 cm above and below sensor midpoint, so  
 659 sensors shallower than 25 cm were retained, to match the depths of microbial soil samples.

660

661 To decide which sensor depths were most relevant for microbial communities, we compared  
 662 sensor data to gravimetric SWC measurements, which were associated with the soil sub-samples  
 663 used for microbial analyses (NEON DP1.10047.001). To match the units of volumetric SWC  
 664 sensor data, gravimetric SWC,  $\theta_g$ , was converted to volumetric SWC,  $\theta_v$ , by multiplying SWC  
 665 by soil bulk density,  $BD$ :

666

$$\theta_v = \theta_g * BD$$

668

669 Soil bulk density was derived from each site from an initial characterization product (NEON  
 670 DP1.10047.001); data were subsetted to soil horizons no deeper than 35 cm and mean bulk  
 671 density was calculated for the site. The resulting moisture measurements from samples and soil  
 672 sensors were compared via linear regression  $R^2$  values, and the second shallowest sensor layer  
 673 (approx. 6 cm deep at most sites) had the strongest relationship and was used for soil moisture  
 674 inputs.

675

## Forecasting the soil microbiome at a continental scale

676 Moisture data were gap-filled using daily soil moisture values from soil sensor networks when  
677 available, and from satellite-derived values otherwise. Gap-filling used data from Soil Climate  
678 Analysis Network (SCAN), NASA's Soil Moisture Active Passive (SMAP) satellite, and ESA's  
679 Soil Moisture and Ocean Salinity (SMOS) satellite, in that order (87–89). Correlations with  
680 NEON soil sensor data varied by source (Figure S15).  
681

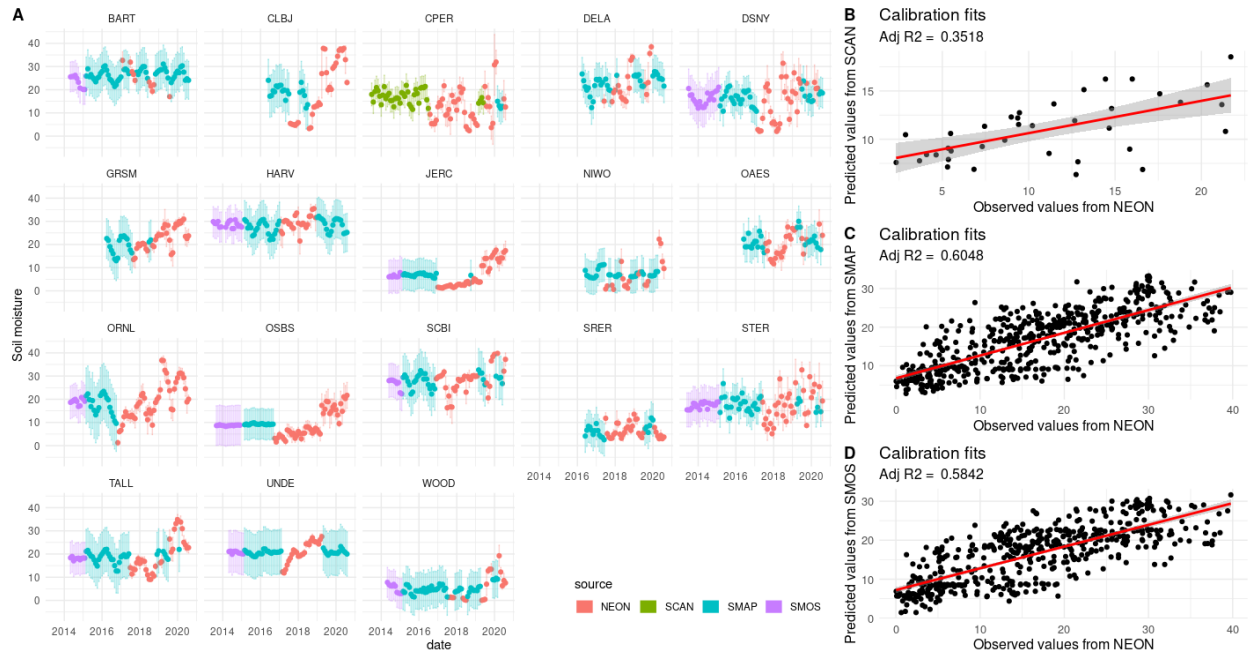

682 **Figure S15. A)** Gap-filled soil moisture time-series for NEON sites. **B-D)** Soil moisture from each source  
683 was modeled as a linear function of NEON soil moisture sensor data, then the regression was used to  
684 predict soil moisture at sites or monthly with missing soil moisture values. Uncertainty from sensor  
685 uncertainty and monthly averaging was propagated into monthly predictions using an errors-in-variables  
686 (EIV) approach in the NIMBLE statistical software.  
687

688

### Soil moisture/temperature averaging and uncertainty propagation:

690 NEON calculates expanded uncertainty estimates, which incorporate individual measurement  
691 uncertainty into time-averaged mean uncertainties for 30-minute means (described in (90, 91)).  
692 Because we averaged data by the month, we scaled up the uncertainties associated with each  
693 measurement (reported by NEON as "Expanded Uncertainty" and "Standard Error") by sampling  
694 random biases and errors from a month's 30-minute measurements to add to each month's mean  
695 values, resulting in a site-level time-series with varying amounts of uncertainty depending on  
696 data source and reported measurement uncertainty.

697

### Soil pH and percent carbon

699 Many soil cores used for microbial samples had associated measurements of soil pH and percent  
700 carbon reported in DP1.10086.001 (92). For forecasts, however, we do not expect to know where  
701 in a plot the soil cores will come from; therefore, plot-level mean values were constructed using

## Forecasting the soil microbiome at a continental scale

702 all previous soil pH and percent carbon measurements, and these plot-level values were used for  
703 prediction, with site-level values used to gap-fill any missing plot-level values. One site with no  
704 soil chemistry measurements from any year was excluded from models (ABBY).  
705

### A pH at 3 representative NEON sites

Plot-level means were treated as constant over time.

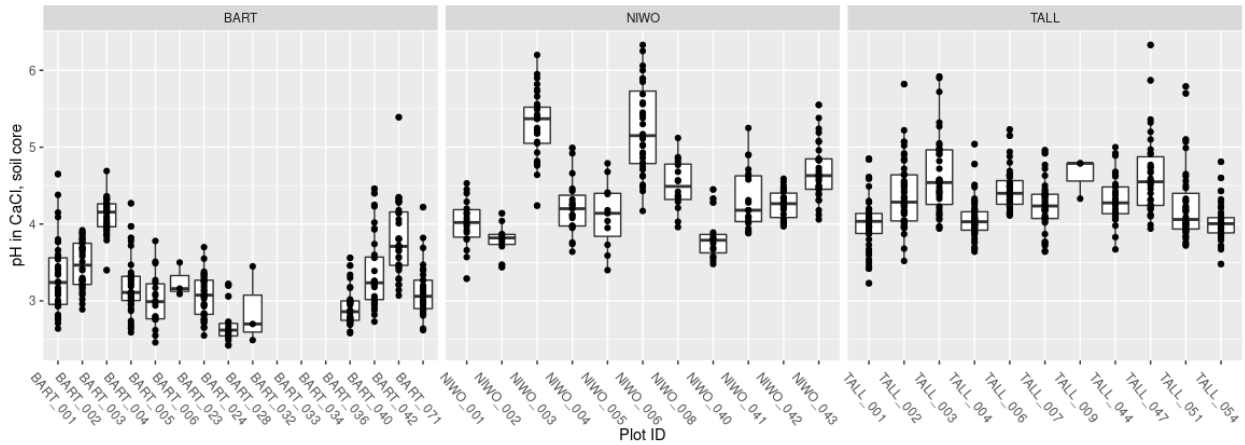

### B Percent carbon at 3 representative NEON sites

Plot-level means were treated as constant over time.

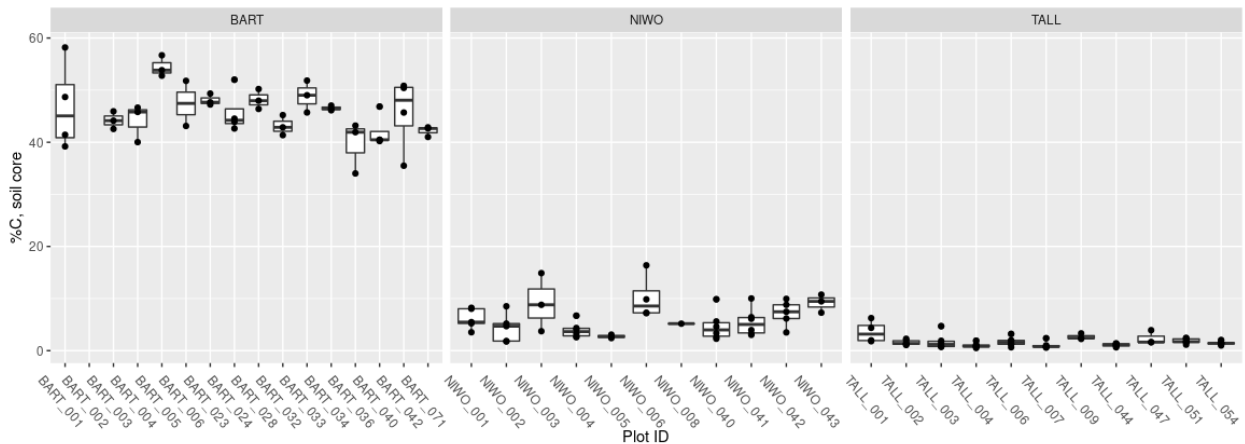

706

707 **Figure S16.** Variation across sampling plots and timepoints, within 3 example NEON sites, for  
708 observed measurements of A) soil pH and B) soil percent carbon. Points indicate individual  
709 measurements that were aggregated at the plot level.

710

### 711 Ectomycorrhizal basal area percent

712 Percent basal area of ectomycorrhizal trees was estimated using stem diameter from the NEON  
713 woody plant vegetation structure (DP1.10098.001) (93)), with ectomycorrhizal status assigned to  
714 individual trees using species names. After accounting for insect-damaged and fallen trees, basal  
715 area of trees was scaled to the plot level and values were averaged over all years of  
716 measurements. The following site identifiers had a land cover type of "Cultivated Crops",

## Forecasting the soil microbiome at a continental scale

717 "Shrub/Scrub", or "Grassland/Herbaceous" and consequently had no ectomycorrhizal tree  
718 abundances: BARR, CPER, DCFS, JORN, KONA, OAES, STER, TOOL, and WOOD.

719

### 720 Leaf area index (LAI)

721 To calculate the monthly LAI for each site, we first use the site latitude and longitude as input to  
722 the `call_modis` function from the PecanTools R package (94) to download the satellite-based  
723 MOD15A2H Version 6 Moderate Resolution Imaging Spectroradiometer (MODIS) combined  
724 Leaf Area Index (LAI) and Fraction of Photosynthetically Active Radiation (FPAR) product  
725 (95). LAI values were then averaged from each site and month from the 8-day composite values.

### 726 Appendix S2: Determination of calibration time period

727

728 Provisional data from NEON was available to extend the time series to additional years, but  
729 inclusion of these data led to higher forecast bias. This had a known cause for bacterial  
730 sequences (a methodological shift in 16S amplicon sequencing primers (17)) but the bias could  
731 not be explained for fungi. After evaluating the hindcasts, we increased the model calibration  
732 period to include all available data (spanning 2018-2020, but only for a subset of sites), which  
733 increased precision in environmental predictor covariates and reduced overall confidence  
734 intervals (Figure S17).

735

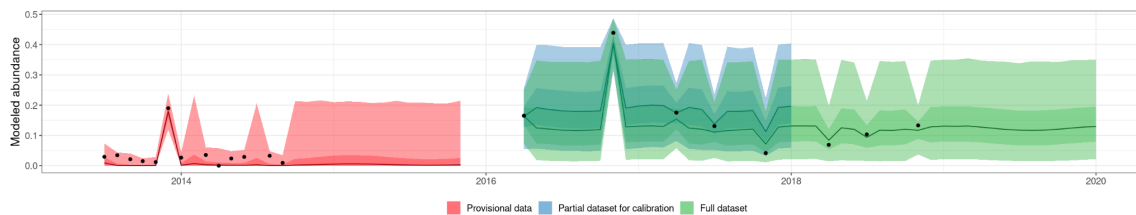

736

737 **Figure S17.** Calibration periods used in this analysis, shown as a time-series at one plot. Provisional data  
738 (red) was dropped due to bias caused by methodological changes. Partial dataset (blue) was used to  
739 evaluate forecasts. Full dataset (green) was used to create forecasts that can be evaluated in the future.

### 740 Appendix S3: Nimble Statistical Modeling Code.

741 The Nimble code below (embedded in R) represents a dynamic linear model of a single group,  
742 with environmental covariates and seasonal predictors included. Nimble code for the two simpler  
743 models is hosted at <https://github.com/zoey-rw/microbialForecasts>.

744

745 Nimble is a Bayesian statistical language and software with benefits for ecological modeling  
746 (96). It creates custom statistical distributions that represent common ecological data formats,  
747 such as counts, zero-inflation, and correlated data. For iterative forecasting in particular, the  
748 availability of cutting-edge data assimilation algorithms (e.g. sequential monte carlo filters)  
749 enables states to efficiently be updated with new data.

750

## Forecasting the soil microbiome at a continental scale

751 Data (observation) model

752 In constructing the statistical model, we evaluated the following distributions for the data model  
753 (lines 3-6 in Example Code below), representing the microbial relative abundances observed in  
754 multiple soil samples taken from the same plot (about 20m<sup>2</sup>). To increase computational  
755 efficiency, we leveraged the advantage of conjugate Gibbs sampling whenever possible:  
756 parameterizations of variance terms (e.g. distributions such as gamma, Inverse gamma, Normal  
757 truncated).

758

759 *Dirichlet distribution*

760 The Dirichlet distribution is a multivariate generalization of the beta distribution, allowing  
761 multiple fractional abundances to be modeled at once (17, 97). This accounts for covariance  
762 among microbial taxa arising simply from the "sum-to-one" constraint. However, the number of  
763 model-estimated parameters increases linearly with the number of taxa included, and model  
764 fitting is much less efficient (evaluated using Effective Sample Size (ESS) / computation time,  
765 from the compareMCMCs R package (98)). When low-abundance taxa are included, model-  
766 fitting occurred on the scale of weeks or months, rather than hours or days. Additionally, the  
767 Dirichlet distribution does not account for correlation between increased sequencing depth and  
768 precision, which can lead to heteroskedastic observation error. We found that predicted  
769 coefficients were qualitatively similar between the Dirichlet and Beta regression approaches.

770

771 *Multinomial Dirichlet distribution*

772 The multinomial Dirichlet distribution has the properties of the Dirichlet distribution, with an  
773 additional set of parameters representing observation error. This is a natural choice for microbial  
774 data, since it can model fractional abundances as well as the effects of sequencing depth.  
775 However, it had the same practical drawbacks as standard Dirichlet, with even lower model-  
776 fitting efficiency and high sensitivity to model priors and initial conditions.

777

778 *Normal distribution with CLR transformation*

779 The center log-ratio (CLR) transformation is a common choice for microbial relative abundance  
780 data because it reduces the impact of the sum-to-one constraint by scaling all abundances against  
781 the geometric mean of a "reference" taxon (99). Because transformed values enter an unbounded  
782 space (-Inf, Inf), the Normal distribution can be used for modeling observations. However, this  
783 approach can make forecasts harder to interpret: forecast users may have to transform values  
784 back to (0,1) for interpretability, or apply the CLR-transformation to all subsequent microbial  
785 samples to compare observations with forecasts. We found that models fit to CLR-transformed  
786 data produced similar parameter estimates to models fit with Beta-distributed relative  
787 abundances, but the overall convergence rate was lower, especially for rare (low-abundance) taxa  
788 (Fig S18).

789

## Forecasting the soil microbiome at a continental scale

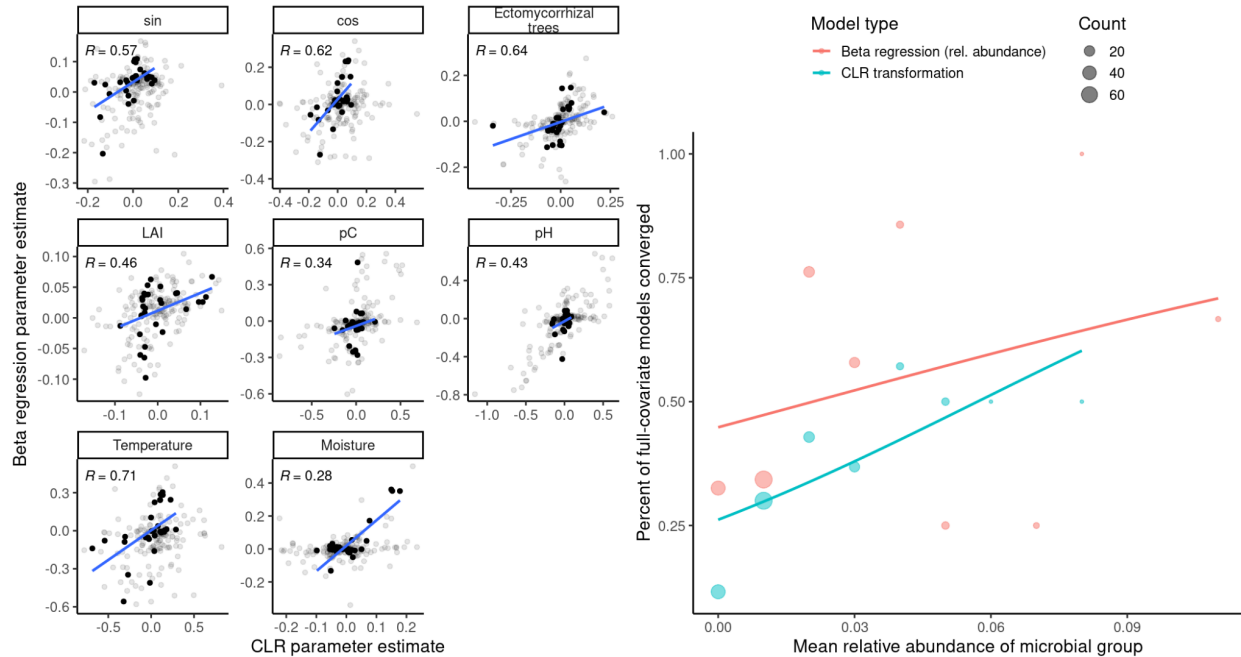

790  
 791 **Figure S18.** Comparison of models fit to microbial data transformed via centered-log ratio  
 792 (CLR) or modeled as beta-distributed relative abundances. Left set of figures shows correlation  
 793 between parameter estimates from the two approaches, calculated from the black points, which  
 794 represent models that converged with both approaches; gray points are models that did not  
 795 converge with one of the approaches. Right panel shows the percent of models converged as a  
 796 function of the mean relative abundance of a group, for all abundance levels with more than one  
 797 group representative. Colors indicate model approach and point size indicates the sample size of  
 798 models at each abundance level.

### 799 Link function

800 Considerations for link function (which links the observed relative abundance values to the  
 801 underlying model of the ecological process): the logit-link is commonly used link function, and  
 802 improved model convergence by reducing proposed MCMC values outside the (0,1) interval. We  
 803 also evaluated models with no link function, or with a log-link, which are both statistically valid,  
 804 but led to much longer convergence times.

### 805 Bayesian prior considerations

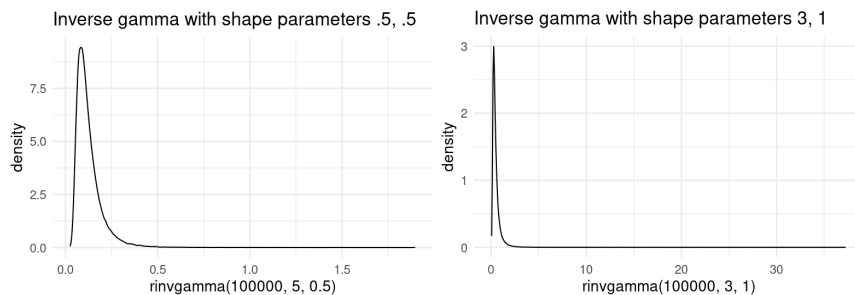

## Forecasting the soil microbiome at a continental scale

807 **Figure S19.** Distributions chosen as weakly informative priors in hierarchical Bayesian models.

808

809 Priors for process error (sigma, lines 46) and core-level variation (core\_sd, line 45) were  
810 represented by an Inverse gamma distribution (Fig S19A). Priors for site effect variation (sig,  
811 line 47) were represented by a more lenient inverse gamma distribution (Fig 19B).

812

813 Error around environmental predictor values (lines 55-81) represents a combination of multiple  
814 error sources, which were modeled separately to reduce computational effort. This includes  
815 instrument error, reported by some of the data sources (see Appendix S2), and uncertainty  
816 around the specific sampling date within a month (represented by the standard deviation of the  
817 entire month's values).

818

819 Priors for coefficients associated with environmental predictors (lines 53) were given relatively  
820 flat priors with a mean of zero and a precision of .0001, corresponding to a standard deviation of  
821 100. These priors could be improved with domain-specific knowledge from experimental or field  
822 manipulation, e.g. heat-loving soil extremophiles may be assigned a strong positive prior  
823 distribution, representing scientific evidence for an effect. However, in this analysis,  
824 uninformative priors were used for all environmental predictors to facilitate comparisons  
825 between model structures.

826

827 Code Example 1.

```
828 nimbleMod <- nimble::nimbleCode({
```

```
829
```

```
830     # Loop through core observations (column 1 of input df "y") ----
```

```
831     for (i in 1:N.core) {
```

```
832         y[i, 1] ~ T(dnorm(mean = plot_mu[plot_num[i], timepoint[i]], sd = core_sd), 0, 1)
```

```
833     }
```

```
834
```

```
835     # Plot-level process model ----
```

```
836     for (p in 1:N.plot) {
```

```
837         for (t in plot_start[p]) {
```

```
838             # Plot means for first date
```

```
839             logit(Ex[p, t]) ~ dnorm(mean = X_init, sd = .2)
```

```
840             plot_mu[p, t] ~ T(dnorm(mean = Ex[p, t], sd = sd_init), 0, 1)
```

```
841         }
```

```
842
```

```
843         # Second date onwards
```

```
844         for (t in plot_index[p]:N.date) {
```

```
845             # Dynamic linear model
```

```
846             logit(Ex[p, t]) <- rho * logit(plot_mu[p, t - 1]) +
```

```
847                 beta[1] * temp_est[plot_site_num[p], t] +
```

```
848                 beta[2] * mois_est[plot_site_num[p], t] +
```

## Forecasting the soil microbiome at a continental scale

```
849         beta[3] * pH_est[p, plot_start[p]] +
850         beta[4] * pC_est[p, plot_start[p]] +
851         beta[5] * relEM[p, t] +
852         beta[6] * LAI[plot_site_num[p], t] +
853         beta[7] * sin_mo[t] +
854         beta[8] * cos_mo[t] +
855         site_effect[plot_site_num[p]] +
856         intercept
857
858         # Define shape parameters for process error (sigma) model
859         shape1[p, t] <- Ex[p, t] * ((Ex[p, t] * (1-Ex[p, t]))/sigma^2 - 1)
860         shape2[p, t] <- (1 - Ex[p, t]) * ((Ex[p, t] * (1-Ex[p, t]))/sigma^2 - 1)
861
862         # Add process error (sigma)
863         logit(plot_mu[p, t]) ~ dLogitBeta(shape1[p, t], shape2[p, t])
864     }
865 }
866
867 # Priors for site effects----
868 for (k in 1:N.site) {
869     site_effect[k] ~ dnorm(0, sd = sig)
870 }
871
872 core_sd ~ dinvgamma(5,.5)
873 sigma ~ dinvgamma(5,.5)
874 sig ~ dinvgamma(3,1)
875
876 intercept ~ dnorm(0, sd = 1)
877 rho ~ dnorm(0, sd = 1) # Autocorrelation
878 X_init <- .5 # Initial plot mean - will be constrained by data
879 sd_init <- .01 # Initial process error
880 beta[1:8] ~ dnmnorm(zeros[1:8], omega[1:8, 1:8])
881
882 # Add driver uncertainty if specified ----
883 if (temporalDriverUncertainty) {
884     for (k in 1:N.site) {
885         for (t in site_start[k]:N.date) {
886             mois_est[k, t] ~ dnorm(mois[k, t], sd = mois_sd[k, t])
887             temp_est[k, t] ~ dnorm(temp[k, t], sd = temp_sd[k, t])
888         }
889     }
890 } else {
891     for (k in 1:N.site) {
892         for (t in site_start[k]:N.date) {
```

## Forecasting the soil microbiome at a continental scale

```
893             mois_est[k, t] <- mois[k, t]
894             temp_est[k, t] <- temp[k, t]
895         }
896     }
897 }
898 if (spatialDriverUncertainty) {
899     for (p in 1:N.plot) {
900         pH_est[p, plot_start[p]] ~ dnorm(pH[p, plot_start[p]], sd = pH_sd[p,
901 plot_start[p]])
902         pC_est[p, plot_start[p]] ~ dnorm(pC[p, plot_start[p]], sd = pC_sd[p,
903 plot_start[p]])
904     }
905 } else {
906     for (p in 1:N.plot) {
907         pH_est[p, plot_start[p]] <- pH[p, plot_start[p]]
908         pC_est[p, plot_start[p]] <- pC[p, plot_start[p]]
909     }
910 }
911
912 }) #end NIMBLE model
913
914
```

## Forecasting the soil microbiome at a continental scale

### REFERENCES

1. J. K. Jansson, K. S. Hofmockel, Soil microbiomes and climate change. *Nat. Rev. Microbiol.* **18**, 35–46 (2020).
2. C. Gougioulas, J. M. Clark, L. J. Shaw, The role of soil microbes in the global carbon cycle: Tracking the below-ground microbial processing of plant-derived carbon for manipulating carbon dynamics in agricultural systems. *J. Sci. Food Agric.* **94**, 2362–2371 (2014).
3. R. Hooke, *Micrographia, or, Some Physiological Descriptions of Minute Bodies Made by Magnifying Glasses with Observations and Inquiries Thereupon* / by R. Hooke ... (1665; <https://quod.lib.umich.edu/e/eebo/A44323.0001.001?view=toc>).
4. A. van Leewenhoeck, Observations, communicated to the publisher by Mr. Antony van Leewenhoeck, in a dutch letter of the 9th Octob. 1676. here English'd: concerning little animals by him observed in rain-well-sea- and snow water; as also in water wherein pepper had lain infused. *Philos. Trans. R. Soc. Lond.* **12**, 821–831 (1677).
5. Winogradsky, S, Recherches sur les Organismes de la Nitrification. *Ann. L'Institut Pasteur*, 577–616. (1891).
6. W. R. Wieder, G. B. Bonan, S. D. Allison, Global soil carbon projections are improved by modelling microbial processes. *Nat. Clim. Change* **3**, 909–912 (2013).
7. K. Lajtha, V. Bailey, K. McFarlane, K. Paustian, D. Bachelet, R. Abramoff, D. Angers, S. A. Billings, D. Cerkowski, Y. G. Dialynas, A. Finzi, N. French, S. Frey, N. Gurwick, J. Harden, J. M. F. Johnson, K. Johnson, J. Lehmann, S. (Leo) Liu, B. McConkey, U. Mishra, S. Ollinger, D. Paré, F. Paz, D. deB. Richter, S. M. Schaeffer, J. Schimel, C. Shaw, J. Tang, K. Todd-Brown, C. Trettin, M. Waldrop, T. Whitman, K. Wickland, Chapter 12: Soils. Second State of the Carbon Cycle Report. doi: 10.7930/SOCCR2.2018.Ch12 (2018).
8. N. W. Schaad, “Emerging Plant Pathogenic Bacteria and Global Warming” in *Pseudomonas Syringae Pathovars and Related Pathogens – Identification, Epidemiology and Genomics*, M. Fatmi, A. Collmer, N. S. Iacobellis, J. W. Mansfield, J. Murillo, N. W. Schaad, M. Ullrich, Eds. (Springer Netherlands, Dordrecht, 2008; [https://doi.org/10.1007/978-1-4020-6901-7\\_38](https://doi.org/10.1007/978-1-4020-6901-7_38)), pp. 369–379.
9. M. Delgado-Baquerizo, C. A. Guerra, C. Cano-Díaz, E. Egidi, J. Wang, N. Eisenhauer, B. K. Singh, F. T. Maestre, The proportion of soil-borne pathogens increases with warming at the global scale. *Nat. Clim. Change*, doi: 10.1038/s41558-020-0759-3 (2020).
10. FAO, ITPS, GSBI, CBD, EC., *State of Knowledge of Soil Biodiversity - Status, Challenges and Potentialities* (Food and Agriculture Organization of the United Nations, Rome, 2020).
11. M. C. Dietze, Prediction in ecology: A first-principles framework. *Ecol. Appl.* **27**, 2048–2060 (2017).
12. M. C. Dietze, A. Fox, L. M. Beck-Johnson, J. L. Betancourt, M. B. Hooten, C. S. Jarnevich, T. H. Keitt, M. A. Kenney, C. M. Laney, L. G. Larsen, H. W. Loescher, C. K. Lurch, B. C. Pijanowski, J. T. Randerson, E. K. Read, A. T. Tredennick, R. Vargas, K. C. Weathers, E. P. White, Iterative near-term ecological forecasting: Needs, opportunities, and challenges. *Proc. Natl. Acad. Sci. U. S. A.* **115**, 1424–1432 (2018).
13. C. C. Carey, W. M. Woelmer, M. E. Lofton, R. J. Figueiredo, B. J. Bookout, R. S. Corrigan, V. Daneshmand, A. G. Hounshell, D. W. Howard, A. S. L. Lewis, R. P. McClure, H. L. Wander, N. K. Ward, R. Q. Thomas, Advancing lake and reservoir water quality management with near-term, iterative ecological forecasting. *Inland Waters*, doi: 10.1080/20442041.2020.1816421 (2020).
14. M. E. Lofton, J. A. Brentrup, W. S. Beck, J. A. Zwart, R. Bhattacharya, L. S. Brighenti, S. H. Burnet, I. M. McCullough, B. G. Steele, C. C. Carey, K. L. Cottingham, M. C. Dietze, H. A. Ewing, K. C. Weathers, S. L. LaDeau, Using near-term forecasts and uncertainty partitioning to inform prediction of oligotrophic lake cyanobacterial density. *Ecol. Appl.* **32**, e2590 (2022).
15. D. J. Currie, Where Newton might have taken ecology. *Glob. Ecol. Biogeogr.* **28**, 18–27 (2019).
16. M. C. Dietze, *Ecological Forecasting* (Princeton University Press, 2019).

## Forecasting the soil microbiome at a continental scale

17. C. Averill, Z. R. Werbin, K. F. Atherton, J. M. Bhatnagar, M. C. Dietze, Soil microbiome predictability increases with spatial and taxonomic scale. *Nat. Ecol. Evol.* **5**, 747–756 (2021).
18. N. J. Bouskill, H. C. Lim, S. Borglin, R. Salve, T. E. Wood, W. L. Silver, E. L. Brodie, Pre-exposure to drought increases the resistance of tropical forest soil bacterial communities to extended drought. *ISME J.* **7**, 384–394 (2013).
19. S. M. Hatosy, J. B. H. Martiny, R. Sachdeva, J. Steele, J. A. Fuhrman, A. C. Martiny, Beta diversity of marine bacteria depends on temporal scale. *Ecology* **94**, 1898–1904 (2013).
20. S. Ferrenberg, S. P. O’neill, J. E. Knelman, B. Todd, S. Duggan, D. Bradley, T. Robinson, S. K. Schmidt, A. R. Townsend, M. W. Williams, C. C. Cleveland, B. A. Melbourne, L. Jiang, D. R. Nemergut, Changes in assembly processes in soil bacterial communities following a wildfire disturbance. *ISME J.* **7**, 1102–1111 (2013).
21. A. Bissett, A. E. Richardson, G. Baker, S. Wakelin, P. H. Thrall, Life history determines biogeographical patterns of soil bacterial communities over multiple spatial scales. *Mol. Ecol.* **19**, 4315–4327 (2010).
22. M. Goberna, M. Verdú, Phylogenetic-scale disparities in the soil microbial diversity–ecosystem functioning relationship. *ISME J.* **12**, 2152–2162 (2018).
23. J. B. H. Martiny, S. E. Jones, J. T. Lennon, A. C. Martiny, Microbiomes in light of traits: A phylogenetic perspective. *Science* **350** (2015).
24. C. Averill, L. A. L. Cates, M. C. Dietze, J. M. Bhatnagar, Spatial vs. temporal controls over soil fungal community similarity at continental and global scales. *ISME J.* **13**, 1–34 (2019).
25. A. C. Finzi, R. Z. Abramoff, K. S. Spiller, E. R. Brzostek, B. A. Darby, M. A. Kramer, R. P. Phillips, Rhizosphere processes are quantitatively important components of terrestrial carbon and nutrient cycles. *Glob. Change Biol.* **21**, 2082–2094 (2015).
26. K. Zhalnina, K. B. Louie, Z. Hao, N. Mansoori, U. N. Da Rocha, S. Shi, H. Cho, U. Karaoz, D. Loqué, B. P. Bowen, M. K. Firestone, T. R. Northen, E. L. Brodie, Dynamic root exudate chemistry and microbial substrate preferences drive patterns in rhizosphere microbial community assembly. *Nat. Microbiol.* **3**, 470–480 (2018).
27. K. L. Matulich, C. Weihe, S. D. Allison, A. S. Amend, R. Berlemont, M. L. Goulden, S. Kimball, A. C. Martiny, J. B. H. Martiny, Temporal variation overshadows the response of leaf litter microbial communities to simulated global change. *ISME J.* **9**, 2477–2489 (2015).
28. S. K. Chapman, G. S. Newman, Biodiversity at the plant-soil interface: Microbial abundance and community structure respond to litter mixing. *Oecologia* **162**, 763–769 (2010).
29. R. Z. Abramoff, A. C. Finzi, Are above- and below-ground phenology in sync? *New Phytol.* **205**, 1054–1061 (2015).
30. J. Voříšková, V. Brabcová, T. Cajthaml, P. Baldrian, Seasonal dynamics of fungal communities in a temperate oak forest soil. *New Phytol.* **201**, 269–278 (2014).
31. A. C. Martiny, K. Treseder, G. Pusch, Phylogenetic conservatism of functional traits in microorganisms. *ISME J.* **7**, 830–838 (2013).
32. J. Cavender-Bares, A. Keen, B. Miles, PHYLOGENETIC STRUCTURE OF FLORIDIAN PLANT COMMUNITIES DEPENDS ON TAXONOMIC AND SPATIAL SCALE. *Ecology* **87**, S109–S122 (2006).
33. J. Cavender-Bares, K. H. Kozak, P. V. A. Fine, S. W. Kembel, The merging of community ecology and phylogenetic biology. *Ecol. Lett.* **12**, 693–715 (2009).
34. A. Shade, R. R. Dunn, S. A. Blowes, P. Keil, B. J. M. Bohannan, M. Herrmann, K. Küsel, J. T. Lennon, N. J. Sanders, D. Storch, J. Chase, Macroecology to Unite All Life, Large and Small. *Trends Ecol. Evol.* **33**, 731–744 (2018).
35. C. Kaiser, M. Koranda, B. Kitzler, L. Fuchslueger, J. Schneckner, P. Schweiger, F. Rasche, S. Zechmeister-Boltenstern, A. Sessitsch, A. Richter, Belowground carbon allocation by trees drives seasonal patterns of extracellular enzyme activities by altering microbial community composition in a beech forest soil. *New Phytol.* **187**, 843–858 (2010).
36. X. Shan, A. Goyal, R. Gregor, O. X. Cordero, Annotation-free discovery of functional groups in

## Forecasting the soil microbiome at a continental scale

- microbial communities. *bioRxiv*, 2022.08.02.502537 (2022).
37. X. Xiao, N. Zhang, H. Ni, Y. Yang, J. Zhou, B. Sun, Y. Liang, A latitudinal gradient of microbial  $\beta$ -diversity in continental paddy soils. *Glob. Ecol. Biogeogr.* **30**, 909–919 (2021).
  38. C. P. Andam, J. R. Doroghazi, A. N. Campbell, P. J. Kelly, M. J. Choudoir, D. H. Buckley, A Latitudinal Diversity Gradient in Terrestrial Bacteria of the Genus *Streptomyces*. *mBio* **7**, e02200-15 (2016).
  39. S. Bickel, X. Chen, A. Papritz, D. Or, A hierarchy of environmental covariates control the global biogeography of soil bacterial richness. *Sci. Rep.* **9**, 12129 (2019).
  40. S. Bickel, D. Or, Soil bacterial diversity mediated by microscale aqueous-phase processes across biomes. *Nat. Commun.* **11**, 116 (2020).
  41. K. Bodner, C. Rauen Firkowski, J. R. Bennett, C. Brookson, M. Dietze, S. Green, J. Hughes, J. Kerr, M. Kunegel-Lion, S. J. Leroux, E. McIntire, P. K. Molnár, C. Simpkins, E. Tekwa, A. Watts, M. Fortin, Bridging the divide between ecological forecasts and environmental decision making. *Ecosphere* **12**, e03869 (2021).
  42. R. Tecon, D. Or, Biophysical processes supporting the diversity of microbial life in soil. *FEMS Microbiol. Rev.* **41**, 599–623 (2017).
  43. C. Averill, B. G. Waring, C. V. Hawkes, Historical precipitation predictably alters the shape and magnitude of microbial functional response to soil moisture. *Glob. Change Biol.* **22**, 1957–1964 (2016).
  44. A. E. Zanne, K. Abarenkov, M. E. Afkhami, C. A. Aguilar-Trigueros, S. Bates, J. M. Bhatnagar, P. E. Busby, N. Christian, W. K. Cornwell, T. W. Crowther, H. Flores-Moreno, D. Floudas, R. Gazis, D. Hibbett, P. Kennedy, D. L. Lindner, D. S. Maynard, A. M. Milo, R. H. Nilsson, J. Powell, M. Schildhauer, J. Schilling, K. K. Treseder, Fungal functional ecology: bringing a trait-based approach to plant-associated fungi. *Biol. Rev.* **95**, 409–433 (2020).
  45. S. Pölme, K. Abarenkov, R. Henrik Nilsson, B. D. Lindahl, K. E. Clemmensen, H. Kauserud, N. Nguyen, R. Kjølner, S. T. Bates, P. Baldrian, T. G. Frøslev, K. Adojaan, A. Vizzini, A. Suija, D. Pfister, H. O. Baral, H. Järv, H. Madrid, J. Nordén, J. K. Liu, J. Pawlowska, K. Pöldmaa, K. Pärtel, K. Runnel, K. Hansen, K. H. Larsson, K. D. Hyde, M. Sandoval-Denis, M. E. Smith, M. Toome-Heller, N. N. Wijayawardene, N. Menolli, N. K. Reynolds, R. Drenkhan, S. S. N. Maharachchikumbura, T. B. Gibertoni, T. Læssøe, W. Davis, Y. Tokarev, A. Corrales, A. M. Soares, A. Agan, A. R. Machado, A. Argüelles-Moyao, A. Detheridge, A. de Meiras-Ottoni, A. Verbeken, A. K. Dutta, B. K. Cui, C. K. Pradeep, C. Marín, D. Stanton, D. Gohar, D. N. Wanasinghe, E. Otsing, F. Aslani, G. W. Griffith, T. H. Lumbsch, H. P. Grossart, H. Masigol, I. Timling, I. Hiiesalu, J. Oja, J. Y. Kupagme, J. Geml, J. Alvarez-Manjarrez, K. Ilves, K. Loit, K. Adamson, K. Nara, K. Kungas, K. Rojas-Jimenez, K. Bitenieks, L. Irinyi, L. L. Nagy, L. Soonvald, L. W. Zhou, L. Wagner, M. C. Aime, M. Öpik, M. I. Mujica, M. Metsoja, M. Ryberg, M. Vasar, M. Murata, M. P. Nelsen, M. Cleary, M. C. Samarakoon, M. Doilom, M. Bahram, N. Hagh-Doust, O. Dulya, P. Johnston, P. Kohout, Q. Chen, Q. Tian, R. Nandi, R. Amiri, R. H. Perera, R. dos Santos Chikowski, R. L. Mendes-Alvarenga, R. Garibay-Orijel, R. Gielen, R. Phookamsak, R. S. Jayawardena, S. Rahimlou, S. C. Karunarathna, S. Tibpromma, S. P. Brown, S. K. Sepp, S. Mundra, Z. H. Luo, T. Bose, T. Vahter, T. Netherway, T. Yang, T. May, T. Varga, W. Li, V. R. M. Coimbra, V. R. T. de Oliveira, V. X. de Lima, V. S. Mikryukov, Y. Lu, Y. Matsuda, Y. Miyamoto, U. Kõljalg, L. Tedersoo, FungalTraits: a user-friendly traits database of fungi and fungus-like stramenopiles. *Fungal Divers.* **105** (2020).
  46. J. D. Hoeksema, C. Averill, J. M. Bhatnagar, E. Brzostek, E. Buscardo, K.-H. Chen, H.-L. Liao, L. Nagy, N. Policelli, J. Ridgeway, J. A. Rojas, R. Vilgalys, Ectomycorrhizal Plant-Fungal Co-invasions as Natural Experiments for Connecting Plant and Fungal Traits to Their Ecosystem Consequences. *Front. For. Glob. Change* **3**, 1–13 (2020).
  47. S. Kramer, D. Dibbern, J. Moll, M. Hueninghaus, R. Koller, D. Krueger, S. Marhan, T. Urich, T. Wubet, M. Bonkowski, F. Buscot, T. Lueders, E. Kandeler, Resource partitioning between bacteria, fungi, and protists in the detritusphere of an agricultural soil. *Front. Microbiol.* **7**, 1–12 (2016).

## Forecasting the soil microbiome at a continental scale

48. D. S. Maynard, K. R. Covey, T. W. Crowther, N. W. Sokol, E. W. Morrison, S. D. Frey, L. T. A. van Diepen, M. A. Bradford, Species associations overwhelm abiotic conditions to dictate the structure and function of wood-decay fungal communities. *Ecology* **99**, 801–811 (2018).
49. B. L. Turner, E. Laliberté, Soil Development and Nutrient Availability Along a 2 Million-Year Coastal Dune Chronosequence Under Species-Rich Mediterranean Shrubland in Southwestern Australia. *Ecosystems* **18**, 287–309 (2015).
50. L. R. Walker, D. A. Wardle, R. D. Bardgett, B. D. Clarkson, The use of chronosequences in studies of ecological succession and soil development. *J. Ecol.* **98**, 725–736 (2010).
51. L. F. Stanish, J. Parnell, NEON.DOC.000908: TOS Science Design for Terrestrial Microbial Diversity. *NEON Doc. Libr.* (2018).
52. L. Stanish, S. Weintraub, E.-L. S. Hinckley, J. Parnell, K. Thibault, M. Stewart, TOS PROTOCOL AND PROCEDURE: SOIL BIOGEOCHEMICAL AND MICROBIAL SAMPLING.
53. B. J. Callahan, P. J. McMurdie, M. J. Rosen, A. W. Han, A. J. A. Johnson, S. P. Holmes, DADA2: High-resolution sample inference from Illumina amplicon data. *Nat. Methods* **13**, 581–583 (2016).
54. C. Qin, R. Bartelme, Y. A. Chung, D. Fairbanks, Y. Lin, D. Liptzin, C. Muscarella, K. Naithani, K. Peay, P. Pellitier, A. St. Rose, L. Stanish, Z. Werbin, K. Zhu, From DNA sequences to microbial ecology: Wrangling NEON soil microbe data with the neonMicrobe R package. *Ecosphere* **12** (2021).
55. S. Theil, E. Rifa, rANOMALY: AmplicoN wOrkflow for Microbial community AnaLYsis. *F1000Research* **10**, 1–24 (2021).
56. R. H. Nilsson, K. H. Larsson, A. F. S. Taylor, J. Bengtsson-Palme, T. S. Jeppesen, D. Schigel, P. Kennedy, K. Picard, F. O. Glöckner, L. Tedersoo, I. Saar, U. Kõljalg, K. Abarenkov, The UNITE database for molecular identification of fungi: Handling dark taxa and parallel taxonomic classifications. *Nucleic Acids Res.* **47**, D259–D264 (2019).
57. S. Theil, E. Rifa, UTOPIA: an automatically UpdaTed, cOmPlete and consistent ITS reference dAtabase. *Colloq. Génomique Environnementale*, 0–1 (2019).
58. C. Quast, E. Pruesse, P. Yilmaz, J. Gerken, T. Schweer, P. Yarza, J. Peplies, F. O. Glöckner, The SILVA ribosomal RNA gene database project: Improved data processing and web-based tools. *Nucleic Acids Res.* **41**, 590–596 (2013).
59. D. H. Parks, M. Chuvochina, C. Rinke, A. J. Mussig, P.-A. Chaumeil, P. Hugenholtz, GTDB: an ongoing census of bacterial and archaeal diversity through a phylogenetically consistent, rank normalized and complete genome-based taxonomy. *Nucleic Acids Res.* **202**, 1–10 (2021).
60. Y. Jia, S. Zhao, W. Guo, L. Peng, F. Zhao, L. Wang, G. Fan, Y. Zhu, D. Xu, G. Liu, R. Wang, X. Fang, H. Zhang, K. Kristiansen, W. Zhang, J. Chen, Sequencing introduced false positive rare taxa lead to biased microbial community diversity, assembly, and interaction interpretation in amplicon studies. *Environ. Microbiome* **17**, 43 (2022).
61. A. Scoma, Functional groups in microbial ecology: updated definitions of piezophiles as suggested by hydrostatic pressure dependence on temperature. *ISME J.* **15**, 1871–1878 (2021).
62. N. H. Nguyen, Z. Song, S. T. Bates, S. Branco, L. Tedersoo, J. Menke, J. S. Schilling, P. G. Kennedy, FUNGuild: An open annotation tool for parsing fungal community datasets by ecological guild. *Fungal Ecol.* **20**, 241–248 (2016).
63. D. Naylor, S. Fansler, C. Brislawn, W. C. Nelson, K. S. Hofmockel, J. K. Jansson, R. McClure, Deconstructing the soil microbiome into reduced-complexity functional modules. *mBio* **11**, 1–19 (2020).
64. A. Ho, D. P. Di Lonardo, P. L. E. Bodelier, Revisiting life strategy concepts in environmental microbial ecology. *FEMS Microbiol. Ecol.* **93**, 1–14 (2017).
65. R. Berlemont, A. C. Martiny, Phylogenetic distribution of potential cellulases in bacteria. *Appl. Environ. Microbiol.* **79**, 1545–1554 (2013).
66. M. B. N. Albright, B. Timalisina, J. B. H. Martiny, J. Dunbar, Comparative Genomics of Nitrogen Cycling Pathways in Bacteria and Archaea. *Microb. Ecol.*, doi: 10.1007/s00248-018-1239-4 (2018).
67. R. Lücking, M. C. Aime, B. Robbertse, A. N. Miller, H. A. Ariyawansa, T. Aoki, G. Cardinali, P.

## Forecasting the soil microbiome at a continental scale

- W. Crous, I. S. Druzhinina, D. M. Geiser, D. L. Hawksworth, K. D. Hyde, L. Irinyi, R. Jeewon, P. R. Johnston, P. M. Kirk, E. Malosso, T. W. May, W. Meyer, M. Öpik, V. Robert, M. Stadler, M. Thines, D. Vu, A. M. Yurkov, N. Zhang, C. L. Schoch, Unambiguous identification of fungi: Where do we stand and how accurate and precise is fungal DNA barcoding? *IMA Fungus* **11** (2020).
68. B. J. Callahan, K. Sankaran, J. A. Fukuyama, P. J. McMurdie, S. P. Holmes, Bioconductor Workflow for Microbiome Data Analysis: from raw reads to community analyses. *F1000Research* **5**, 1492 (2016).
  69. J. Ooms, S. Chamberlain, L. S. Reyes, phylocomr: Interface to “Phylocom,” (2023); <https://cran.r-project.org/package=phylocomr>.
  70. S. Viveló, J. M. Bhatnagar, An evolutionary signal to fungal succession during plant litter decay. *FEMS Microbiol. Ecol.* **95**, fiz145 (2019).
  71. S. L. P. Ferrari, F. Cribari-Neto, Beta regression for modelling rates and proportions. *J. Appl. Stat.* **31**, 799–815 (2004).
  72. A. M. Stolwijk, H. Straatman, G. A. Zielhuis, Studying seasonality by using sine and cosine functions in regression analysis. *J. Epidemiol. Community Health* **53**, 235–238 (1999).
  73. M. Friedl, J. Gray, D. Sulla-Menashe, MODIS/Terra+Aqua Land Cover Dynamics Yearly L3 Global 500m SIN Grid V061 [Data set] (2022). <https://doi.org/10.5067/MODIS/MCD12Q2.061>.
  74. J. Gray, D. Sulla-Menashe, M. A. Friedl, User Guide to Collection 6 MODIS Land Cover Dynamics (MCD12Q2) Product.
  75. P. De Valpine, D. Turek, C. J. Paciorek, C. Anderson-Bergman, D. T. Lang, R. Bodik, Programming With Models: Writing Statistical Algorithms for General Model Structures With NIMBLE. *J. Comput. Graph. Stat.* **26**, 403–413 (2017).
  76. C. K. Enders, D. Tofighi, Centering Predictor Variables in Cross-Sectional Multilevel Models: A New Look at an Old Issue. *Psychol. Methods* **12**, 121–138 (2007).
  77. M. Plummer, N. Best, K. Cowles, K. Vines, {CODA}: Convergence Diagnosis and Output Analysis for {MCMC}. *R News* **6**, 7–11 (2006).
  78. A. Jordan, F. Krüger, S. Lerch, Evaluating probabilistic forecasts with scoringRules. *J. Stat. Softw.* **90** (2019).
  79. R Development Core Team, R: A language and environment for statistical computing., R Foundation for Statistical Computing (2008).
  80. NEON (National Ecological Observatory Network), Soil temperature (DP1.00041.001), RELEASE-2023.; <https://doi.org/10.48443/9g10-ep60>.
  81. K. H. Liland, B.-H. Mevik, R. Wehrens, pls: Partial Least Squares and Principal Component Regression (2023). <https://cran.r-project.org/package=pls>.
  82. J. Lamour, S. Serbin, spectratrait: A simple add-on package to aid in the fitting of leaf-level spectratrait PLSR models (2023).
  83. Y. Benjamini, Y. Hochberg, Controlling the false discovery rate : A practical and powerful approach to multiple testing author ( s ): Yoav Benjamini and Yosef Hochberg Source : Journal of the Royal Statistical Society . Series B ( Methodological ), Vol . 57 , No . 1 ( 1995 ), Publi. *J. R. Stat. Soc.* **57**, 289–300 (1995).
  84. B. Gräler, E. Pebesma, G. Heuvelink, Spatio-Temporal Interpolation using gstat. *R J.* **8**, 204–218 (2016).
  85. C. Wang, R. Furrer, Monte Carlo Permutation Tests for Assessing Spatial Dependence at Difference Scales. *Nonparametric Stat.* (2018).
  86. M. M. Thornton, R. Shrestha, Y. Wei, P. E. Thornton, S. Kao, B. E. Wilson, *Daymet: Daily Surface Weather Data on a 1-Km Grid for North America, Version 4* (ORNL Distributed Active Archive Center, 2020; [https://daac.ornl.gov/cgi-bin/dsviewer.pl?ds\\_id=1840](https://daac.ornl.gov/cgi-bin/dsviewer.pl?ds_id=1840)).
  87. G. L. Schaefer, M. H. Cosh, T. J. Jackson, The USDA Natural Resources Conservation Service Soil Climate Analysis Network (SCAN). *J. Atmospheric Ocean. Technol.* **24**, 2073–2077 (2007).
  88. and Q. L. Reichle, R., G. De Lannoy, R. D. Koster, W. T. Crow, J. S. Kimball, SMAP L4 Global 3-hourly 9 km EASE-Grid Surface and Root Zone Soil Moisture Analysis Update, Version 4 (2017).

## Forecasting the soil microbiome at a continental scale

- <https://doi.org/10.5067/60HB8VIP2T8W>.
89. J. Font, C. Gabarró, J. Ballabrera, A. Turiel, J. Martínez, M. Umbert, F. Pérez, N. Hoareau, M. Portabella, V. González, J. Gourrion, S. Guimbard, M. Piles, A. Camps, M. Vall-Llossera, SMOS CP34 soil moisture and ocean salinity maps. *2012 12th Spec. Meet. Microw. Radiom. Remote Sens. Environ. MicroRad 2012 - Proc.*, doi: 10.1109/MicroRad.2012.6185236 (2012).
  90. E. Ayres, J. Roberti, T. Meehan, S. Petroy, T. Meehan, V. Aleksiev, NEON ALGORITHM THEORETICAL BASIS DOCUMENT (ATBD) TIS SOIL TEMPERATURE.
  91. E. Ayres, J. Roberti, K. Thibault, NEON ALGORITHM THEORETICAL BASIS DOCUMENT (ATBD): TIS SOIL WATER CONTENT AND WATER SALINITY.
  92. NEON (National Ecological Observatory Network), Soil physical and chemical properties, periodic (DP1.10086.001), RELEASE-2023.; <https://doi.org/10.48443/0phb-j505>.
  93. NEON (National Ecological Observatory Network), Vegetation structure (DP1.10098.001), RELEASE-2023.; <https://doi.org/10.48443/73zn-k414>.
  94. D. S. LeBauer, The Predictive Ecosystem Analyzer (PEcAn) is an integrated ecological bioinformatics toolbox.: PecanProject/pecan, (2019); <https://github.com/PecanProject/pecan>.
  95. T. Myneni, R., Knyazikhin, Y., Park, MOD15A2H MODIS Leaf Area Index/FPAR 8-Day L4 Global 500m SIN Grid V006. *NASA EOSDIS Land Process. DAAC* (2015).
  96. L. C. Ponisio, P. de Valpine, N. Michaud, D. Turek, One size does not fit all: Customizing MCMC methods for hierarchical models using NIMBLE. *Ecol. Evol.* **10**, 2385–2416 (2020).
  97. V. Pawlowsky-Glahn, J. J. Egozcue, R. Tolosana-Delgado, Modeling and Analysis of Compositional Data. *Model. Anal. Compos. Data*, 1–247 (2015).
  98. P. De Valpine, S. Paganin, D. Turek, compareMCMCs: An R package for studying MCMC efficiency. *J. Open Source Softw.* **7**, 3844 (2022).
  99. T. P. Quinn, I. Erb, G. Gloor, C. Notredame, M. F. Richardson, T. M. Crowley, A field guide for the compositional analysis of any-omics data. *GigaScience* **8**, 1–14 (2019).
